# Supplementary material
Source: PubMed Central journal article supplement (PMC4253822)
Supplement: pro0023-1813-sd1.pdf [file pro0023-1813-sd1.pdf]

**Table S1** J. Janin A minimal model of protein-protein affinity

| $\Delta G_d$ , iRMSD, $\Delta ASA$ from Kastiris et al. (2011)                                                                                                |       |                            |                           |                                    |                                 |
|---------------------------------------------------------------------------------------------------------------------------------------------------------------|-------|----------------------------|---------------------------|------------------------------------|---------------------------------|
| $\Delta G_{calc} = \alpha + \beta \Delta ASA + \gamma (iRMSD)^2$ for $iRMSD \leq d_{max}$                                                                     |       |                            |                           |                                    |                                 |
| $\alpha=6.1 \text{ kcal.mol}^{-1}$ , $\beta=3.8 \text{ cal.mol.}\text{\AA}^{-2}$ , $\gamma=-1.7 \text{ kcal.mol.}\text{\AA}^{-2}$ , $d_{max}=1.5 \text{ \AA}$ |       |                            |                           |                                    |                                 |
| Complex PDB                                                                                                                                                   | Class | $\Delta G_d$<br>(kcal/mol) | iRMSD<br>( $\text{\AA}$ ) | $\Delta ASA$<br>( $\text{\AA}^2$ ) | $\Delta G_{calc}$<br>(kcal/mol) |
| 1A2K_C:AB                                                                                                                                                     | O     | 9.3                        | 1.11                      | 1603                               | 10.1                            |
| 1ACB_E:I                                                                                                                                                      | EI    | 13.1                       | 1.08                      | 1544                               | 10.0                            |
| 1AHW_AB:C                                                                                                                                                     | A     | 11.6                       | 0.69                      | 1899                               | 12.5                            |
| 1AK4_A:D                                                                                                                                                      | O     | 6.4                        | 1.33                      | 1029                               | 7.0                             |
| 1AKJ_AB:DE                                                                                                                                                    | O     | 5.3                        | 1.14                      | 1995                               | 11.5                            |
| 1ATN_A:D                                                                                                                                                      | O     | 12.1                       | 3.28                      | 1774                               | 9.0                             |
| 1AVX_A:B                                                                                                                                                      | EI    | 12.5                       | 0.47                      | 1585                               | 11.8                            |
| 1AVZ_B:C                                                                                                                                                      | NC    | 6.5                        | 0.73                      | 1259                               | 10.0                            |
| 1AY7_A:B                                                                                                                                                      | NC    | 13.2                       | 0.54                      | 1237                               | 10.3                            |
| 1B6C_A:B                                                                                                                                                      | O     | 8.9                        | 1.96                      | 1752                               | 8.9                             |
| 1BJ1_HL:VW                                                                                                                                                    | AB    | 11.6                       | 0.50                      | 1731                               | 12.3                            |
| 1BRS_A:D                                                                                                                                                      | EI    | 17.3                       | 0.42                      | 1555                               | 11.7                            |
| 1BUH_A:B                                                                                                                                                      | EI    | 9.7                        | 0.75                      | 1324                               | 10.2                            |
| 1BVK_DE:F                                                                                                                                                     | A     | 10.5                       | 1.24                      | 1321                               | 8.5                             |
| 1BVN_P:T                                                                                                                                                      | EI    | 15.1                       | 0.87                      | 2222                               | 13.3                            |
| 1CBW_ABC:D                                                                                                                                                    | NC    | 10.7                       | 0.74                      | 1457                               | 10.7                            |
| 1DE4_AB:CF                                                                                                                                                    | O     | 9.8                        | 2.59                      | 2066                               | 10.1                            |
| 1DFJ_E:I                                                                                                                                                      | EI    | 18.0                       | 1.02                      | 2582                               | 14.1                            |
| 1DQJ_AB:C                                                                                                                                                     | A     | 11.7                       | 0.75                      | 1765                               | 11.9                            |
| 1E4K_AB:C                                                                                                                                                     | O     | 7.9                        | 2.59                      | 1634                               | 8.5                             |
| 1E6E_A:B                                                                                                                                                      | EX    | 8.3                        | 1.33                      | 2315                               | 11.9                            |
| 1E6J_HL:P                                                                                                                                                     | A     | 10.3                       | 1.05                      | 1245                               | 9.0                             |
| 1E96_A:B                                                                                                                                                      | O     | 7.4                        | 0.71                      | 1179                               | 9.7                             |
| 1EAW_A:B                                                                                                                                                      | EI    | 14.1                       | 0.54                      | 1866                               | 12.7                            |
| 1EEX_A:BC                                                                                                                                                     | O     | 15.6                       | 2.44                      | 3347                               | 15.0                            |
| 1EFN_B:A                                                                                                                                                      | O     | 10.1                       | 0.90                      | 1253                               | 9.5                             |
| 1EMV_A:B                                                                                                                                                      | EI    | 18.6                       | 1.28                      | 1535                               | 9.2                             |
| 1EWY_A:C                                                                                                                                                      | EX    | 7.4                        | 0.80                      | 1502                               | 10.7                            |
| 1EZU_C:AB                                                                                                                                                     | EI    | 13.8                       | 1.21                      | 2751                               | 14.1                            |
| 1F34_A:B                                                                                                                                                      | EI    | 14.2                       | 0.93                      | 3038                               | 16.2                            |
| 1F6M_A:C                                                                                                                                                      | EX    | 7.6                        | 4.90                      | 1830                               | 9.2                             |
| 1FC2_C:D                                                                                                                                                      | O     | 10.4                       | 1.69                      | 1307                               | 7.2                             |
| 1FFW_A:B                                                                                                                                                      | O     | 8.1                        | 1.43                      | 1170                               | 7.1                             |
| 1FLE_E:I                                                                                                                                                      | EI    | 12.3                       | 1.02                      | 1771                               | 11.1                            |
| 1FQJ_A:B                                                                                                                                                      | O     | 9.8                        | 0.91                      | 1806                               | 11.6                            |
| 1FSK_BC:A                                                                                                                                                     | AB    | 13.1                       | 0.45                      | 1623                               | 11.9                            |
| 1GCQ_B:C                                                                                                                                                      | O     | 6.5                        | 0.92                      | 1208                               | 9.3                             |
| 1GL1_A:I                                                                                                                                                      | EI    | 13.2                       | 1.20                      | 1595                               | 9.7                             |
| 1GLA_G:F                                                                                                                                                      | EX    | 6.8                        | 0.98                      | 1304                               | 9.4                             |
| 1GPW_A:B                                                                                                                                                      | O     | 11.3                       | 0.65                      | 2097                               | 13.4                            |
| 1GRN_A:B                                                                                                                                                      | O     | 9.0                        | 1.22                      | 2332                               | 12.4                            |
| 1GXD_A:C                                                                                                                                                      | EI    | 11.7                       | 1.39                      | 2445                               | 12.1                            |
| 1H1V_A:G                                                                                                                                                      | O     | 10.2                       | 1.05                      | 2071                               | 12.1                            |
| 1H9D_A:B                                                                                                                                                      | O     | 9.2                        | 1.32                      | 2125                               | 11.2                            |
| 1HCF_AB:X                                                                                                                                                     | O     | 13.1                       | 0.88                      | 2146                               | 12.9                            |

|             |    |      |      |      |      |
|-------------|----|------|------|------|------|
| 1HE8_B:A    | O  | 7.4  | 0.92 | 1305 | 9.6  |
| 1HIA_AB:I   | EI | 10.8 | 1.40 | 1737 | 9.4  |
| 1I2M_A:B    | O  | 15.8 | 2.12 | 2779 | 12.8 |
| 1I4D_D:AB   | O  | 7.5  | 1.41 | 1657 | 9.0  |
| 1I81_AB:E   | O  | 9.8  | 2.09 | 2808 | 12.9 |
| 1IBR_A:B    | O  | 12.1 | 2.54 | 3370 | 15.1 |
| 1IJK_A:BC   | EX | 10.4 | 0.68 | 1648 | 11.6 |
| 1IQD_AB:C   | AB | 15.0 | 0.48 | 1976 | 13.2 |
| 1J2J_A:B    | O  | 8.1  | 0.63 | 1209 | 10.0 |
| 1JIW_P:I    | EI | 15.5 | 2.07 | 2018 | 9.9  |
| 1JMO_A:HL   | EX | 9.5  | 3.21 | 3461 | 15.4 |
| 1JPS_HL:T   | A  | 13.6 | 0.51 | 1852 | 12.7 |
| 1JTG_B:A    | EI | 12.8 | 0.49 | 2600 | 15.6 |
| 1JWH_CD:A   | EX | 11.1 | 1.27 | 1451 | 8.9  |
| 1K5D_AB:C   | O  | 12.8 | 1.19 | 2527 | 13.3 |
| 1KAC_A:B    | O  | 10.7 | 0.95 | 1456 | 10.1 |
| 1KKL_ABC:H  | EX | 10.0 | 2.20 | 1641 | 8.5  |
| 1KLU_AB:D   | O  | 7.3  | 0.43 | 1254 | 10.6 |
| 1KTZ_A:B    | O  | 8.9  | 0.39 | 989  | 9.6  |
| 1KXP_A:D    | O  | 12.3 | 1.12 | 3341 | 16.7 |
| 1KXQ_H:A    | AB | 11.5 | 0.72 | 2172 | 13.5 |
| 1LFD_B:A    | O  | 7.8  | 1.79 | 1167 | 6.7  |
| 1M10_A:B    | EX | 11.2 | 2.10 | 2097 | 10.2 |
| 1MAH_A:F    | EI | 14.5 | 0.61 | 2145 | 13.6 |
| 1MLC_AB:E   | NC | 9.6  | 0.60 | 1392 | 10.8 |
| 1MQ8_A:B    | O  | 7.5  | 1.76 | 1241 | 7.0  |
| 1NB5_AP:I   | EI | 13.9 | 1.58 | 1802 | 9.1  |
| 1NCA_HL:N   | AB | 11.0 | 0.24 | 1953 | 13.4 |
| 1NSN_HL:S   | AB | 16.0 | 0.35 | 1776 | 12.6 |
| 1NVU_Q:S    | O  | 7.4  | 1.98 | 3127 | 14.2 |
| 1NVU_R:S    | O  | 7.8  | 3.09 | 3452 | 15.4 |
| 1NW9_B:A    | EX | 9.3  | 1.97 | 2112 | 10.3 |
| 1OC0_A:B    | EX | 12.3 | 1.00 | 1313 | 9.4  |
| 1OPH_A:B    | EI | 11.3 | 1.20 | 1360 | 8.8  |
| 1P2C_AB:C   | A  | 13.6 | 0.46 | 1456 | 11.3 |
| 1PPE_E:I    | EI | 15.6 | 0.34 | 1688 | 12.3 |
| 1PVH_A:B    | O  | 9.5  | 0.34 | 1403 | 11.2 |
| 1PXV_A:C    | EI | 13.0 | 2.63 | 2336 | 11.2 |
| 1QA9_A:B    | O  | 7.2  | 0.73 | 1353 | 10.3 |
| 1R0R_E:I    | EI | 14.2 | 0.45 | 1409 | 11.1 |
| 1R6Q_A:C    | EX | 8.8  | 1.67 | 2450 | 11.6 |
| 1RLB_ABCD:E | O  | 8.2  | 0.66 | 1439 | 10.8 |
| 1RV6_VW:X   | O  | 13.9 | 1.09 | 1639 | 10.3 |
| 1S1Q_A:B    | O  | 4.3  | 0.98 | 1288 | 9.4  |
| 1T6B_X:Y    | O  | 13.1 | 0.62 | 1948 | 12.9 |
| 1US7_A:B    | EX | 8.1  | 1.06 | 1106 | 8.4  |
| 1UUG_A:B    | EI | 19.0 | 0.77 | 2121 | 13.2 |
| 1VFB_AB:C   | A  | 11.5 | 1.02 | 1383 | 9.6  |
| 1WDW_BD:A   | EX | 12.7 | 1.29 | 3159 | 15.3 |
| 1WEJ_HL:F   | A  | 12.5 | 0.31 | 1177 | 10.4 |
| 1WQ1_R:G *  | O  | 6.6  | 1.16 | 2913 | 14.9 |
| 1XD3_A:B    | O  | 8.9  | 1.24 | 2281 | 12.2 |
| 1XQS_A:C    | O  | 7.1  | 1.77 | 2350 | 11.2 |

|            |    |      |      |      |      |
|------------|----|------|------|------|------|
| 1XU1_ABD:T | O  | 11.2 | 1.30 | 1700 | 9.7  |
| 1YVB_A:I   | EI | 11.2 | 0.51 | 1743 | 12.3 |
| 1Z0K_A:B   | O  | 7.0  | 0.53 | 1787 | 12.4 |
| 1ZHI_A:B   | O  | 9.1  | 0.68 | 1322 | 10.3 |
| 1ZLI_A:B   | EI | 12.0 | 2.53 | 2087 | 10.2 |
| 1ZM4_A:B   | EX | 8.0  | 2.94 | 1554 | 8.2  |
| 2A9K_A:B   | EX | 10.2 | 0.85 | 1751 | 11.5 |
| 2ABZ_B:E   | EI | 11.7 | 0.90 | 1447 | 10.2 |
| 2AJF_A:E   | O  | 10.6 | 0.65 | 1704 | 11.9 |
| 2AQ3_A:B   | NC | 6.7  | 1.82 | 1105 | 6.5  |
| 2B42_A:B   | EI | 12.1 | 0.72 | 2520 | 14.8 |
| 2B4J_AB:C  | O  | 10.9 | 0.99 | 1259 | 9.2  |
| 2BTF_A:P   | O  | 7.7  | 0.75 | 2063 | 13.0 |
| 2COL_A:B   | O  | 9.8  | 2.62 | 2013 | 9.9  |
| 2FJU_B:A   | O  | 7.2  | 1.04 | 1245 | 9.0  |
| 2GO_A:B    | O  | 12.1 | 0.60 | 1631 | 11.7 |
| 2HLE_A:B   | O  | 10.1 | 1.40 | 2116 | 10.8 |
| 2HQS_A:H   | O  | 10.2 | 1.14 | 2333 | 12.8 |
| 2HRK_A:B   | O  | 11.0 | 2.03 | 1595 | 8.3  |
| 2I25_N:L   | A  | 12.3 | 1.21 | 1425 | 9.0  |
| 2I9B_E:A   | O  | 12.9 | 3.79 | 2382 | 11.3 |
| 2J0T_A:D   | EI | 13.3 | 1.23 | 1471 | 9.1  |
| 2JEL_HL:P  | AB | 11.6 | 0.17 | 1501 | 11.8 |
| 2MTA_HL:A  | EX | 7.4  | 0.41 | 1461 | 11.4 |
| 2NYZ_AB:D  | O  | 12.7 | 2.09 | 2160 | 10.5 |
| 2O3B_A:B   | EI | 15.7 | 3.13 | 1684 | 8.7  |
| 2O0B_A:B   | EX | 5.7  | 0.85 | 808  | 7.9  |
| 2OO_AB:C   | EX | 10.7 | 1.42 | 2065 | 10.5 |
| 2OUL_A:B   | EI | 12.0 | 0.53 | 1933 | 13.0 |
| 2OZA_B:A   | O  | 11.7 | 1.89 | 6254 | 26.1 |
| 2PCB_A:B   | NC | 6.8  | 0.45 | 1029 | 9.7  |
| 2PCC_A:B   | EX | 7.9  | 0.39 | 1141 | 10.2 |
| 2PTC_E:I   | EI | 18.0 | 0.28 | 1429 | 11.4 |
| 2SIC_E:I   | EI | 13.8 | 0.36 | 1617 | 12.0 |
| 2SNI_E:I   | EI | 16.0 | 0.35 | 1628 | 12.1 |
| 2TGP_Z:I   | NC | 7.5  | 0.57 | 1432 | 11.0 |
| 2UUY_A:B   | EI | 11.3 | 0.44 | 1280 | 10.6 |
| 2VDB_A:B   | O  | 13.4 | 0.47 | 1807 | 12.6 |
| 2VIR_AB:C  | A  | 12.3 | 0.80 | 1263 | 9.8  |
| 2VIS_AB:C  | NC | 7.4  | 0.80 | 1296 | 9.9  |
| 2WPT_A:B   | NC | 10.7 | 1.61 | 1581 | 8.3  |
| 3BP8_AB:C  | O  | 11.4 | 0.45 | 1398 | 11.1 |
| 3BZD_A:B   | O  | 9.6  | 1.08 | 1312 | 9.1  |
| 3CPH_G:A   | O  | 8.8  | 2.12 | 1685 | 8.7  |
| 3SGB_E:I   | EI | 14.5 | 0.36 | 1268 | 10.7 |
| 4CPA_A:I   | EI | 11.3 | 1.52 | 1177 | 6.8  |
